# Supplementary material for: Four-year respiratory consequences of COVID-19 related pneumonia: a longitudinal cohort study
Source: Research Square preprint supplement (doi:10.21203/rs.3.rs-6142626/v1), 2025-03-27
Supplement: Supplementary file 1 [file d86519a7639f134bcc6a6c9d.docx]

**Four-year respiratory consequences of COVID-19 related pneumonia: a longitudinal cohort study**

**Supplementary Table**

| **Supplementary Table S1.** | | | |
| --- | --- | --- | --- |
|  | **Fibrosis** (n = 10) | **No fibrosis** (n = 77) | **P-value** |
| **Sex,** *No.* (%) |  |  | 0.280 |
| Male | 9 (90.0) | 54 (70.1) |  |
| Female | 1 (10.0) | 23 (29.9) |  |
| **Age (years),** *mean* (SD) | 71.6 (8.3) | 62.0 (13.4) | 0.006 |
| **BMI (kg/m²),** mean (SD) | 30.2 (5.1) | 30.1 (5.3) | 0.825 |
| **Smoking history,** *No.* (%) |  |  | 1.000 |
| Current | 0 (0.0) | 4 (5.2) |  |
| Former | 4 (40.0) | 29 (37.7) |  |
| Never | 6 (60.0) | 44 (57.1) |  |
| **Comorbidities,** *No.* (%) |  |  |  |
| Hypertension | 5 (50.0) | 37 (48.1) | 1.000 |
| Dyslipidemia | 4 (40.0) | 26 (33.8) | 0.730 |
| Diabetes mellitus | 3 (30.0) | 16 (20.8) | 0.702 |
| Respiratory diseases | 3 (30.0) | 19 (24.7) | 0.702 |
| Cardiovascular diseases | 5 (50.0) | 13 (16.9) | 0.033 |
| **Length of hospital stay (days),** *median* [range] | 28 [16-47] | 21 [3-87] | 0.271 |
| **ICU admission,** *No.* (%) | 3 (30.0) | 40 (52.0) | 0.317 |
| *7 persons (6 lost-of-follow up and 1 exitus) were not evaluated at the end of the study for fibrosis | | | |
